# Supplementary material for: IGF binding protein 2 is a cell-autonomous factor supporting survival and migration of acute leukemia cells
Source: PubMed Central journal article supplement (PMC3851819; doi:10.1186/1756-8722-6-72), 2013-10-08
Supplement: 1756-8722-6-72-S1.pdf [file 1756-8722-6-72-S1.pdf]

Supplementary Materials

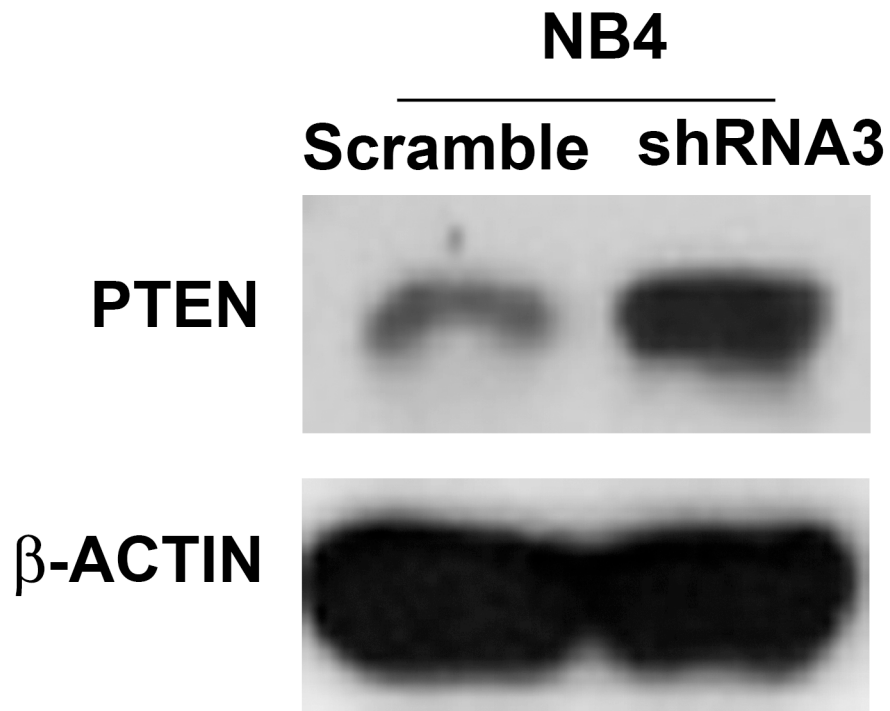

**Figure 1. PTEN levels were increased in NB4 cells treated with shRNA targeting *IGFBP2*.**

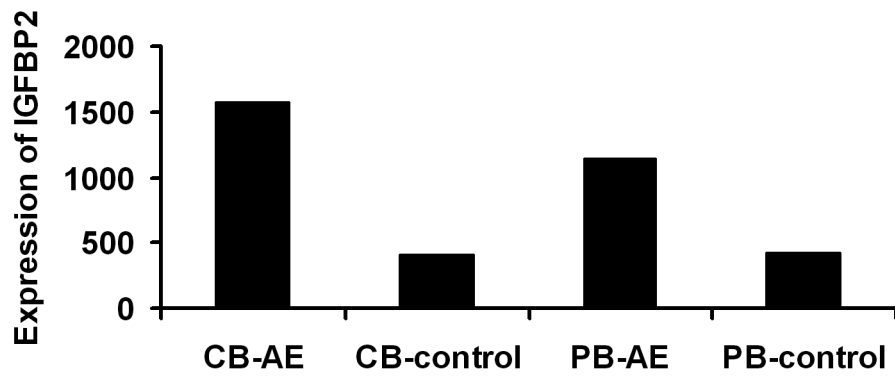

Figure 2. An *in silico* analysis of *IGFBP2* expression in AML1-ETO transduced CD34<sup>+</sup> human cord blood or peripheral blood cells based on the published database

40.
